# Supplementary material for: Perceived Cardiovascular Disease Risk Following Preeclampsia: A Cross-Sectional Study
Source: MDPI journal article supplement (doi:10.3390/healthcare11162356), 2023-08-21
Supplement: s1 [file s1]

## Supplementary file s1: Study questionnaires

### 1. Socio-demographic data:

#### Part 1: personal data:

1. Age: .....

2. Marital status:

1. Married ( )

2. Divorced ( )

3. Widow ( )

3. Education:

1. Basic education ( )

2. Secondary education ( )

3. University education ( )

4. Residence:

1. Rural ( )

2. Urban ( )

5. Monthly income:

1. Sufficient (monthly income  $\geq$  4000 L.E) ( )

2. Insufficient ( )

6. Height: .....

7. Weight: .....

8. **Body Mass Index (BMI)**:.....

#### - Part 2 : History of preeclampsia :

1. Pregnancy complications:

1. Preeclampsia ( )

2. Eclampsia ( )

2. Preeclampsia occurrence in which pregnancy:

1. First ( ) 2. Second ( ) 3. Third ( )

4. Fourth ( ) 5. Fifth ( ) 6. Sixth ( )

3. Did the obstetrician discuss CVD risk with you before hospital discharge?

1. Yes ( )

2. No ( )

3. I do not remember ( )

4. Do you know the relationship between CVD and Preeclampsia?

1. Yes ( )

2. No ( )

5. If yes, what is the source of your knowledge?

1. Obstetric doctors ( )

2. Internet ( )

## 2. Knowledge of cardiovascular disease:

| CVD <sup>1</sup> Knowledge Items                                                                                 | True | False | I do not know |
|------------------------------------------------------------------------------------------------------------------|------|-------|---------------|
| 1. Advanced age increases the risk of coronary heart disease development.                                        |      |       |               |
| 2. Heart disease related to heart artery blockages develops slowly over many years and can easily go undetected  |      |       |               |
| 3. Women are more likely to have heart disease after menopause than before.                                      |      |       |               |
| 4. High cholesterol level may cause heart artery blockages.                                                      |      |       |               |
| 5. Symptoms of heart pain or heart attack may include neck, shoulder, or arm pain, back pain, and dizziness.     |      |       |               |
| 6. African American women are more likely than white women to have heart disease.                                |      |       |               |
| 7. High blood pressure may cause heart disease and stroke.                                                       |      |       |               |
| 8. Some forms of heart disease may indeed result in stroke                                                       |      |       |               |
| 9. Symptoms of stroke are sudden numbness or weakness in the face, arm, or leg and sudden confusion.             |      |       |               |
| 10. Smoking may cause heart artery blockages.                                                                    |      |       |               |
| 11. Symptoms of heart pain or heart attack may include chest pain, chest tightness, and unusual fatigue.         |      |       |               |
| 12. Heart disease and stroke are the leading cause of women's death.                                             |      |       |               |
| 13. A risk factor for heart disease that can be changed is heredity.                                             |      |       |               |
| 14. Reducing dietary red meat may prevent heart artery blockages.                                                |      |       |               |
| 15. Symptoms of a heart attack may include shortness of breath, sweating and nausea.                             |      |       |               |
| 16. Reducing dietary cholesterol may prevent heart disease.                                                      |      |       |               |
| 17. Stress may cause heart disease.                                                                              |      |       |               |
| 18. African American women are more likely than white women to die from a heart attack or stroke.                |      |       |               |
| 19. Obesity may increase the risk of heart disease.                                                              |      |       |               |
| 20. There is no evidence that hormone therapy or replacement prevents heart disease.                             |      |       |               |
| 21. A high-fat diet may cause heart artery blockages.                                                            |      |       |               |
| 22. Low levels of some female hormones may increase heart artery blockages in women.                             |      |       |               |
| 23. Routine exercise may prevent heart disease.                                                                  |      |       |               |
| 24. Diabetes increases the chance of having heart disease.                                                       |      |       |               |
| 25. A history of preeclampsia increases the risk of coronary heart disease and stroke. .                         |      |       |               |
| 26. A family history of heart disease from a clogged heart artery may increase the risk of having heart disease. |      |       |               |

### 3. Perception of Risk of Heart Disease Scale (PRHDS)

| Item                                                                          | Strongly disagree | Disagree | Agree | Strongly agree |
|-------------------------------------------------------------------------------|-------------------|----------|-------|----------------|
| 1. There is a possibility that I have heart disease                           |                   |          |       |                |
| 2. There is a good chance I will get heart disease during the next 10 years   |                   |          |       |                |
| 3. A person who gets heart disease has no chance of being cured               |                   |          |       |                |
| 4. I have a high chance of getting heart disease because of my past behaviors |                   |          |       |                |
| 5. I feel sure that I will get heart disease                                  |                   |          |       |                |
| 6. Healthy lifestyle habits is something unattainable*                        |                   |          |       |                |
| 7. It is likely that I will get heart disease                                 |                   |          |       |                |
| 8. I am at risk for getting heart disease                                     |                   |          |       |                |
| 9. It is possible that I will get heart disease                               |                   |          |       |                |
| 10. I am not doing anything now that is unhealthy to my heart*                |                   |          |       |                |
| 11. I am too young to have a heart disease*                                   |                   |          |       |                |
| 12. People like me do not get heart disease*                                  |                   |          |       |                |
| 13. I am very healthy so my body can fight off heart disease*                 |                   |          |       |                |
| 14. I am not worried that I might get heart disease*                          |                   |          |       |                |
| 15. People my age are too young to get heart disease*                         |                   |          |       |                |
| 16. People my age do not get heart disease*                                   |                   |          |       |                |
| 17. My lifestyle habits do not put me at risk for heart disease*              |                   |          |       |                |
| 18. No matter what I do, if I am going to get heart disease, I will get it*   |                   |          |       |                |
| 19. People who don't get heart disease, are just plain lucky*                 |                   |          |       |                |
| 20. Heart disease has unknown cause*                                          |                   |          |       |                |

Note: \* Reverse scoring of the item is required

Dread Risk ( 1,2,4,5,7,8,9), Risk (3,11,12,14,15,16), Unknown risk ( 6,10,13,17,18,19,20)
